# Supplementary material
Source: publisher site journal article supplement (https://www.dovepress.com/article/399996)
Supplement: Supplementary file 1 [file get_supplementary_file.php]

**Figure S1: Classification of Left Ventricle Remodeling**

LVMI, left ventricle mass index; RWT: relative wall thickness.

**Table S1. Echocardiography measurements in different patterns of LV remodeling after 5 years’ follow up**

| Echocardiography |  | **Subgroups of LV remodeling** | | | |  |
| --- | --- | --- | --- | --- | --- | --- |
| All subjects  n=869 | Normal geometry  n=704 | CR  n=68 | EH  n=76 | CH  n=20 | *P*-value |
| LVMI (g/h2.71) | 35.14±8.69 | 32.94±6.36 | 34.85±6.08 | 52.47±5.87 | 52.44±7.76 | 0.000 |
| RWT | 0.35±0.05 | 0.33±0.03 | 0.44±0.03 | 0.35±0.04 | 0.46±0.06 | 0.000 |
| LVEF (%) | 65.09±3.01 | 65.21±3.21 | 64.97±3.05 | 64.39±2.81 | 63.68±2.81 | 0.019 |
| E/e’ ratio | 6.0(5.0,7.0) | 6.0(5.05,8.0) | 6.50(5.0,8.0) | 7.0(6.0,9.0) | 6.0(4.5,7.0) | 0.127 |
| E/A ratio | 1.12±0.13 | 1.14±0.12 | 1.07±0.15 | 0.83±0.21 | 0.71±0.19 | 0.000 |
| LAD (mm) | 33.56±4.82 | 33.25±4.74 | 33.00±4.94 | 36.06±4.41 | 37.69±4.37 | 0.005 |
| LVIDd (mm) | 44.72±3.81 | 43.60±3.87 | 41.52±3.56 | 50.65±2.76 | 47.96±4.16 | 0.000 |
| LVISd (mm) | 28.36±3.85 | 28.33±3.71 | 26.09±3.79 | 30.59±3.93 | 29.54±3.14 | 0.055 |
| PVWT (mm) | 7.85±1.04 | 7.56±0.81 | 9.17±0.73 | 8.82±1.15 | 10.46±1.24 | 0.000 |
| IVST (mm) | 8.27±1.22 | 8.00±1.00 | 8.91±1.01 | 9.75±1.24 | 10.58±1.91 | 0.000 |

**Notes**: LVM was skewed distribution which was described as median (inter-quartile range), whereas other continuous variables with normal distribution were expressed as the mean±SD. P values were obtained by ANOVA or non-parametric tests of 4 subgroups of LV remodeling. **p* < 0.05 indicated a statistically significant value compared to the corresponding value in normal geometry.

**Abbreviations:** CR, concentric remodeling; EH, eccentric hypertrophy; CH, concentric hypertrophy; LVMI, left ventricle mass index; RWT, relative wall thickness; LVEF, left ventricular ejection fraction; E/e’ ratio, peak early diastolic flow velocity/ e’, mitral annulus early diastolic velocity; E/A ratio, early to late diastolic transmitral flow velocity; LAD, left atrium diameter; LVIDd, left ventricular internal diameter at end-diastole; LVISd, left ventricular at end-systolic diastole; PVWT, posterior left ventricular wall thickness; IVST, interventricular septal thickness.

**Table S2. The comparison of echocardiography measurements in baseline and 5 years’ follow up**

|  | **Subgroups of LV remodeling (in 2014)** | | | | | | | |
| --- | --- | --- | --- | --- | --- | --- | --- | --- |
| Echocardiography | Normal geometry  n=704 | | CR  n=68 | | EH  n=76 | | CH  n=20 | |
|  | baseline | 5 y’ follow up | baseline | 5 y’ follow up | baseline | 5 y’ follow up | baseline | 5 y’ follow up |
| LVMI (g/h2.71) | 30.51±5.19 | 32.94±6.36 | 31.34±7.03 | 34.85±6.08* | 50.64±6.52 | 52.47±5.87 | 48.97±7.94 | 52.44±7.76* |
| RWT | 0.32±0.05 | 0.33±0.03 | 0.38±0.02 | 0.44±0.03 | 0.36±0.05 | 0.35±0.04 | 0.37±0.04 | 0.46±0.06* |
| LVEF (%) | 66.17+4.52 | 65.21±3.21 | 63.50±2.87 | 64.97±3.05 | 64.23±3.12 | 64.39±2.81 | 62.15±4.56 | 63.68±2.81 |
| E/e’ ratio | 6.0(5.15,8.0) | 6.0(5.05,8.0) | 6.50(5.0,8.0) | 6.50(5.0,8.0) | 6.75(5.50,8.75) | 7.0(6.0,9.0)* | 6.25(5.0,7.0) | 6.0(4.5,7.0) |
| E/A ratio | 1.18±0.16 | 1.14±0.12 | 1.11±0.28 | 1.07±0.15 | 0.97±0.22 | 0.83±0.21* | 0.90±0.21 | 0.71±0.19* |
| LAD (mm) | 33.56±4.14 | 33.25±4.74 | 32.55±4.19 | 33.00±4.94 | 33.65±4.18 | 36.06±4.41* | 35.74±4.69 | 37.69±4.37 |
| LVIDd (mm) | 45.96±3.71 | 43.60±3.87* | 42.30±3.94 | 41.52±3.56 | 46.82±3.16 | 50.65±2.76* | 46.21±3.64 | 47.96±4.16 |
| LVISd (mm) | 28.41±4.15 | 28.33±3.71 | 25.47±4.01 | 26.09±3.79 | 30.55±3.51 | 30.59±3.93 | 30.74±4.21 | 29.54±3.14 |
| PVWT (mm) | 7.71±0.96 | 7.56±0.81 | 7.68±0.85 | 9.17±0.73 | 7.91±1.23 | 8.82±1.15 | 9.09±1.02 | 10.46±1.24* |
| IVST (mm) | 8.80±1.11 | 8.00±1.00 | 8.14±0.93 | 8.91±1.01 | 9.46±1.32 | 9.75±1.24 | 9.52±1.58 | 10.58±1.91* |

**Notes**: LVM was skewed distribution which was described as median (inter-quartile range), whereas other continuous variables with normal distribution were expressed as the mean±SD. **p* < 0.05 indicated a statistically significant value compared by paired sample t test between the baseline and 5 y’ follow up groups.

**Abbreviations:** CR, concentric remodeling; EH, eccentric hypertrophy; CH, concentric hypertrophy; LVMI, left ventricle mass index; RWT, relative wall thickness; LVEF, left ventricular ejection fraction; E/e’ ratio, peak early diastolic flow velocity/ e’, mitral annulus early diastolic velocity; E/A ratio, early to late diastolic transmitral flow velocity; LAD, left atrium diameter; LVIDd, left ventricular internal diameter at end-diastole; LVISd, left ventricular at end-systolic diastole; PVWT, posterior left ventricular wall thickness; IVST, interventricular septal thickness.

**Table S3. The clinical risk stratification of LV remodeling by E/A ratio**

| E/A ratio | Unadjusted OR  (95% CI) | *P*-value | Adjusted OR  (95% CI) | *P*-value |
| --- | --- | --- | --- | --- |
| ˃0.8 (n=681) | Reference | *--* | Reference | *---* |
| 0.6-0.8 (n=147) | 1.542(1.107,2.650) | 0.043 | 1.221(0.977, 2.741) | 0.114 |
| 0.6 (n=41) | 2.405(1.721,3.986) | 0.004 | 2.113(1.500,5.986) | 0.036 |

**Abbreviation:** E/A ratio, early to late diastolic transmitral flow velocity
